# Supplementary material for: One-Year Mortality of Cancer Patients with an Unplanned ICU Admission: A Cohort Analysis Between 2008 and 2017 in the Netherlands
Source: Research Square preprint supplement (doi:10.21203/rs.3.rs-111863/v1), 2020-11-23
Supplement: Supplementary file 1 [file 9a7b4c196cddbdc51c61fb4a.docx]

**Supplementary Material Table 2. Summary of percentage of missing values**

|  | **Haematological malignancy** | **Solid malignancy** | **Without**  **malignancy** |
| --- | --- | --- | --- |
| **(n=10,401)** | **(n=35,920)** | **(n=423,984)** |
| ICU | 4 (0.04%) | 4 (0.01%) | 146 (0.03%) |
| Hospital | 584 (5.6%) | 1,415 (3.9%) | 28,007 (6.6%) |
| 1-year | 564 (5.4%) | 2,116 (5.9%) | 29,922 (7.1%) |
