# Supplementary material for: One-Year Mortality of Cancer Patients with an Unplanned ICU Admission: A Cohort Analysis Between 2008 and 2017 in the Netherlands
Source: Research Square preprint supplement (doi:10.21203/rs.3.rs-111863/v1), 2020-11-23
Supplement: Supplementary file 2 [file cc82922ecc1f6e93ee3fb102.docx]

**Supplementary Material Table 3. Count (percentage) of patients with a malignancy as compared to total number of patients in each year over the inclusion period.**

| Year | Haematological malignancy | Solid malignancy | Without malignancy |
| --- | --- | --- | --- |
| 2008 | 583 (2%) | 583 (8%) | 28,921 (90%) |
| 2009 | 810 (2%) | 810 (8%) | 36,779 (90%) |
| 2010 | 908 (2%) | 908 (8%) | 39,082 (90%) |
| 2011 | 990 (2%) | 990 (8%) | 40,757 (90%) |
| 2012 | 985 (2%) | 985 (8%) | 43,389 (90%) |
| 2013 | 1,130 (2%) | 1,130 (7%) | 44,827 (90%) |
| 2014 | 1,215 (2%) | 1,215 (8%) | 47,481 (90%) |
| 2015 | 1,233 (2%) | 1,233 (7%) | 48,116 (90%) |
| 2016 | 1,326 (3%) | 1,326 (7%) | 47,962 (91%) |
| 2017 | 1,221 (2%) | 3,445 (7%) | 46,670 (91%) |
